## Olanzapine for the Prevention of Postdischarge Nausea and Vomiting after Ambulatory Surgery: A Randomized Controlled Trial: Erratum

In the article in the June issue, “Olanzapine for the Prevention of Postdischarge Nausea and Vomiting after Ambulatory Surgery: A Randomized Controlled Trial,” a space was missing between the words “24 h” and “after” in the Conclusions section of the Abstract. The correct sentence is: “When combined with ondansetron and dexamethasone, the addition of olanzapine relative to placebo decreased the risk of nausea and/or vomiting in the 24h after discharge from ambulatory surgery by about 60% with a slight increase in reported sedation.”

The publisher regrets the error. The online version and PDF of the article have been corrected.

DOI: 10.1097/ALN.0000000000003438

### Reference

Hyman JB, Park C, Lin HM, Cole B, Rosen L, Fenske SS, Barr Grzesh RL, Blank SV, Polsky SB, Hartnett M, Taub PJ, Palvia V, DeMaria S Jr, Ascher-Walsh C. Olanzapine for the prevention of postdischarge nausea and vomiting after ambulatory surgery: A randomized controlled trial. *ANESTHESIOLOGY* 2020; 132:1419–28. doi: 10.1097/ALN.0000000000003286.

## COVID-19 Infection: Implications for Perioperative and Critical Care Physicians: Erratum

In the June 2020 issue, the article “COVID-19 Infection: Implications for Perioperative and Critical Care Physicians” (Greenland JR, Michelow MD, Wang L, London MJ. *ANESTHESIOLOGY* 2020; 132: 1346–61. doi: 10.1097/ALN.0000000000003303) contains an error in table 1. In the fifth row describing 52 cases, the Cardiac Injury column should be “23%,” not “12%.”

The authors regret the error. The online version and PDF of the article have been corrected.

DOI: 10.1097/ALN.0000000000003454

### Reference

Greenland JR, Michelow MD, Wang L, London MJ. COVID-19 Infection: Implications for perioperative and critical care physicians. *ANESTHESIOLOGY* 2020; 132:1346–61. doi: 10.1097/ALN.0000000000003303.

## Perioperative Management of Patients Infected with the Novel Coronavirus: Recommendation from the Joint Task Force of the Chinese Society of Anesthesiology and the Chinese Association of Anesthesiologists: Erratum

In the article published in the June 2020 issue entitled “Perioperative Management of Patients Infected with the Novel Coronavirus: Recommendation from the Joint Task Force of the Chinese Society of Anesthesiology and the Chinese Association of Anesthesiologists,” a funder was omitted from the Research Support section, which currently states: “Support was provided solely from institutional and/or departmental sources.” This section should instead state: “Support was provided by the National Key Research and Development Program of China grant No. 2018YFC2001900 (Beijing, China).”

The authors regret the error. The online version and PDF of the article have been corrected.

DOI: 10.1097/ALN.0000000000003340

### Reference

Chen X, Liu Y, Gong Y, Guo X, Zuo M, Li J, Shi W, Li H, Xu X, Mi W, Huang Y; Chinese Society of Anesthesiology, Chinese Association of Anesthesiologists. Perioperative management of patients infected with the novel coronavirus: Recommendation from the Joint Task Force of the Chinese Society of Anesthesiology and the Chinese Association of Anesthesiologists. *ANESTHESIOLOGY* 2020; 132:1307–16. doi: 10.1097/ALN.0000000000003301.
